# Supplementary material
Source: HighWire-hosted journal article supplement (https://gh.bmj.com/content/3/5/e000825)
Supplement: inline-supplementary-material-4 [file inline-supplementary-material-4.pdf]

Creating Opportunities through Mentoring,  
Parental involvement and Safe Spaces  
(COMPASS) Ethiopia, a Cluster-Randomized  
Control Trial

Statistical Analysis Plan

Gary Yu, DrPH

Study Statistician

**Aim of the study**

To investigate the efficacy of a life skills and safe spaces intervention to reduce refugee adolescent girls' exposure to violence.

**End points***Primary outcome measure*

- Sexual violence, last 12 months- composite of:
- Unwanted sexual violence, last 12 months
  - Coerced sex, last 12 months
  - Forced sex, last 12 months

*Secondary outcome measures*

- a) Unwanted sexual violence, last 12 months
- b) Coerced sex, last 12 months
- c) Forced sex, last 12 months
- d) Physical violence, last 12 months
- e) Emotional violence, last 12 months
- f) Transactional sex, last 12 months
- g) Early marriage
- h) Safe at home
- i) Safe at school
- j) Safe at friend's house
- k) Safe at neighbor's house
- l) Safe place to spend time with other girls
- m) Aspiration years of schooling
- n) Aspirational age of marriage
- o) Aspirational age of first child
- p) Attitude toward working outside home after marriage
- q) Have friends
- r) Have trusted non-family female adult in life

**Study Design**

This study used a two group wait-list cluster-randomized control trial. It enrolled 919 Sudanese and South Sudanese girls aged 13 to 19 years who spoke one of four dialects and were registered to participate in the COMPASS program. Participant enrollment took place in July 2015 in three refugee camps in Ethiopia. After participants were enrolled, baseline data were collected; endline data were collected approximately 12 months later. Study procedures were approved by the Institutional Review Board of the Columbia University Medical Center (Protocol #AAAP6855), the Administration for Refugee and Returnee Affairs in Ethiopia, and the IRC's internal review board (Protocol # WPE 1.00.003).

This study was registered at ClinicalTrials.gov with identifier NCT02384642.

**Sample Size Calculation**

The target sample size was originally calculated assuming 20 girls in each cluster; however, program realities in the field led to fewer girls being assigned to each group and thus necessitated a recalculation of our sample size. We assumed 30% prevalence of sexual violence among the population at baseline, and that this prevalence was likely to remain constant among the control group. To calculate the target

sample size, we assumed statistical power of 80% and a two-sided alpha of 0.05 to detect a 35% reduction in the incidence of past-year sexual violence in the intervention arm compared with the waitlist arm. We estimated that each cluster would comprise approximately 15 girls. We assumed an intraclass correlation coefficient (ICC) of 0.06 to account for clustering. We could not find a previous study that measured sexual violence among female adolescents in a sub-Saharan African site. However, a study that assessed intimate partner violence perpetrated against females ages 15-49 years across multiple sites, including Ethiopia, reported all ICCs were less than 0.06.<sup>30</sup> We required 62 clusters, 31 groups in each treatment arm. We expected a 10% loss to follow-up, necessitating a final sample size of at least 896 girls.

### **Statistical Analyses**

12-month follow-up data were collected after completion of the intervention. Outcomes were analyzed using the intention-to-treat principle.

#### *Participant characteristics*

Aim: We can understand participant characteristics by analyzing each factor for each treatment group.

Expression:

Categorical data: Number of participants and percentage.

Continuous data: Mean, SD, median, interquartile range, maximum, and minimum

Factors:

Categorical data:

Language

Camp

Parents living in home

Live with an intimate partner

Sexual violence, last 12 months

    Unwanted sexual violence, last 12 months

    Coerced sex, last 12 months

    Forced sex, last 12 months

Physical violence, last 12 months

Emotional violence, last 12 months

Transactional sex, last 12 months

Early marriage

Safe at home

Safe at school

Safe at friend's house

Safe at neighbor's house

Safe place to spend time with other girls

Aspirational age of marriage

Aspirational age of first child

Attitude toward working outside home after marriage

Have friends

Have trusted non-family female adult in life

Continuous data:

Age

Years of schooling  
Aspiration years of schooling

### **The main statistical analysis for efficacy**

The intervention's effects on binary primary and secondary outcomes at endline were assessed through mixed effects logistic regressions with random intercepts to account for clustering; the intervention's effect on a secondary continuous outcome was assessed using a linear mixed model. After estimating the first-order effect of the intervention on these outcomes, models were adjusted for baseline age, previous engagement in a romantic relationship, and presence of mother, father, or both parents in the home.

Additionally, we ran sensitivity analyses on an imputed dataset. We used multiple imputation in Stata to generate five sets of imputations for all missing outcomes.

#### *Comparison between groups of sexual violence in the last 12 months*

**Measure:** Any form of sexual violence in the last 12 months

**Aim:** Comparison of the adjusted odds ratios of the event between groups

**Test:** z-test

**Significance:** Two-sided p values of less than 0.05 were considered statistically significant.

**Confidence Interval:** 95% confidence interval

**Expression:** Odds ratio for two treatment groups

Using mixed effects logistic regression models, unadjusted and adjusted odds ratios were assessed. Participants missing values for any variables included in the model were excluded from that particular analysis.

### **The secondary statistical analysis for efficacy**

#### Unwanted sexual touching

**Measure:** Experiencing unwanted sexual touching in last 12 months

**Aim:** Comparison of the adjusted odds ratios of the event between groups

**Test:** z-test

**Significance:** Two-sided p values of less than 0.05 were considered statistically significant.

**Confidence Interval:** 95% confidence intervals

**Expression:** Odds ratio for two treatment groups and for three protocol adherence groups

#### Coerced sex

**Measure:** Coerced sex in the last 12 months

**Aim:** Comparison of the adjusted odds ratios of the event between groups

**Test:** z-test

**Significance:** Two-sided p values of less than 0.05 were considered statistically significant.

**Confidence Interval:** 95% confidence intervals

**Expression:** Odds ratio for two treatment groups and for three protocol adherence groups

#### Forced sex

**Measure:** Being forced to have sex in the last 12 months

**Aim:** Comparison of the adjusted odds ratios of the event between groups

**Test:** z-test

**Significance:** Two-sided p values of less than 0.05 were considered statistically significant.  
**Confidence Interval:** 95% confidence intervals  
**Expression:** Odds ratio for two treatment groups and for three protocol adherence groups

#### Physical violence

**Measure:** Physical violence in the last 12 months  
**Aim:** Comparison of the adjusted odds ratios of the event between groups  
**Test:** z-test  
**Significance:** Two-sided p values of less than 0.05 were considered statistically significant.  
**Confidence Interval:** 95% confidence intervals  
**Expression:** Odds ratio for two treatment groups

#### Emotional violence

**Measure:** Emotional violence in the last 12 months  
**Aim:** Comparison of the adjusted odds ratios of the event between groups  
**Test:** z-test  
**Significance:** Two-sided p values of less than 0.05 were considered statistically significant.  
**Confidence Interval:** 95% confidence interval  
**Expression:** Odds ratio for two treatment groups

#### Transactional sex

**Measure:** Transactional sex in the last 12 months  
**Aim:** Comparison of the adjusted odds ratios of the event between groups  
**Test:** z-test  
**Significance:** Two-sided p values of less than 0.05 were considered statistically significant.  
**Confidence Interval:** 95% confidence interval  
**Expression:** Odds ratio for two treatment groups

#### Early marriage

**Measure:** Entering into early marriage in the last 12 months  
**Aim:** Comparison of the adjusted odds ratios of the event between groups  
**Test:** z-test  
**Significance:** Two-sided p values of less than 0.05 were considered statistically significant.  
**Confidence Interval:** 95% confidence interval  
**Expression:** Odds ratio for two treatment groups

#### Safe at home

**Measure:** Feel safe at home  
**Aim:** Comparison of the Beta coefficients for the event between groups  
**Test:** t-test  
**Significance:** Two-sided p values of less than 0.05 were considered statistically significant.  
**Confidence Interval:** 95% confidence interval  
**Expression:** Beta coefficients for two treatment groups

#### Safe at school

**Measure:** Feel safe at school  
**Aim:** Comparison of the Beta coefficients for the event between groups  
**Test:** t-test

**Significance:** Two-sided p values of less than 0.05 were considered statistically significant.  
**Confidence Interval:** 95% confidence interval  
**Expression:** Beta coefficients for two treatment groups

#### Safe at friend's house

**Measure:** Feel safe at friend's house  
**Aim:** Comparison of the Beta coefficients for the event between groups  
**Test:** t-test  
**Significance:** Two-sided p values of less than 0.05 were considered statistically significant.  
**Confidence Interval:** 95% confidence interval  
**Expression:** Beta coefficients for two treatment groups

#### Safe at neighbor's house

**Measure:** Feel safe at neighbor's home  
**Aim:** Comparison of the Beta coefficients for the event between groups  
**Test:** t-test  
**Significance:** Two-sided p values of less than 0.05 were considered statistically significant.  
**Confidence Interval:** 95% confidence interval  
**Expression:** Beta coefficients for two treatment groups

#### Safe place with other girls

**Measure:** Have a safe place to spend time with other girls  
**Aim:** Comparison of the Beta coefficients for the event between groups  
**Test:** t-test  
**Significance:** Two-sided p values of less than 0.05 were considered statistically significant.  
**Confidence Interval:** 95% confidence interval  
**Expression:** Beta coefficients for two treatment groups

#### Schooling aspirations

**Measure:** Highest grade a participant believes should be completed  
**Aim:** Comparison of the Beta coefficients for the event between groups  
**Test:** t-test  
**Significance:** Two-sided p values of less than 0.05 were considered statistically significant.  
**Confidence Interval:** 95% confidence interval  
**Expression:** Beta coefficients for two treatment groups

#### Aspirational age of marriage

**Measure:** Aspire to enter marriage at 18 years or older  
**Aim:** Comparison of the adjusted odds ratios of the event between groups  
**Test:** z-test  
**Significance:** Two-sided p values of less than 0.05 were considered statistically significant.  
**Confidence Interval:** 95% confidence interval  
**Expression:** Odds ratio for two treatment groups

#### Aspirational age of first child

**Measure:** Aspire to have first child at 18 years or older  
**Aim:** Comparison of the adjusted odds ratios of the event between groups  
**Test:** z-test

**Significance:** Two-sided p values of less than 0.05 were considered statistically significant.  
**Confidence Interval:** 95% confidence interval  
**Expression:** Odds ratio for two treatment groups

#### Working outside home after marriage

**Measure:** Believe working outside home after marriage is acceptable  
**Aim:** Comparison of the adjusted odds ratios of the event between groups  
**Test:** z-test  
**Significance:** Two-sided p values of less than 0.05 were considered statistically significant.  
**Confidence Interval:** 95% confidence interval  
**Expression:** Odds ratio for two treatment groups

#### Have friends

**Measure:** Have friends of a similar age outside the family  
**Aim:** Comparison of the adjusted odds ratios of the event between groups  
**Test:** z-test  
**Significance:** Two-sided p values of less than 0.05 were considered statistically significant.  
**Confidence Interval:** 95% confidence interval  
**Expression:** Odds ratio for two treatment groups

#### Trusted non-family female adult

**Measure:** Have a trusted non-family female adult  
**Aim:** Comparison of the adjusted odds ratios of the event between groups  
**Test:** z-test  
**Significance:** Two-sided p values of less than 0.05 were considered statistically significant.  
**Confidence Interval:** 95% confidence interval  
**Expression:** Odds ratio for two treatment groups

#### Sensitivity Analyses

All of the above analyses were implemented on imputed data to ensure results were robust when accounting for missing data. A multiple imputation approach was utilized. Specifically, a set of five imputations was generated in Stata with 'mi impute', after which the average values represented a close estimate of a full dataset.

#### Exploratory Analyses

No exploratory analyses were conducted.
